# Supplementary material for: Flexible tactile sensors with interlocking serrated structures based on stretchable multiwalled carbon nanotube/silver nanowire/silicone rubber composites
Source: Royal Society of Chemistry journal article supplement (doi:10.1039/d4ra00381k), 2024-01-01
Supplement: d4ra00381k1.pdf [file d4ra00381k1.pdf]

Table S1. Value of  $\Delta R/R_0$  of the composite with different mass fraction of CNTs and Ag NWs

| Sample              | Tensile strain (%) |       |       |       |       |       |       |       |       |       |
|---------------------|--------------------|-------|-------|-------|-------|-------|-------|-------|-------|-------|
|                     | 10%                | 20%   | 30%   | 40%   | 50%   | 60%   | 70%   | 80%   | 90%   | 100%  |
| 8%CNTs              | 1.04               | 1.33  | 1.49  | 1.72  | 1.84  | 1.94  | 2.18  | 2.22  | 2.44  | 2.76  |
| 7%CNTs+2%<br>Ag NWs | 3.23               | 2.79  | 2.78  | 2.73  | 2.88  | 3.17  | 3.58  | 4.061 | 5.46  | 7.27  |
| 7%CNTs+4%<br>Ag NWs | 3.17               | 2.86  | 3.21  | 3.84  | 4.51  | 5.73  | 9.08  | 13.62 | 18.44 | 27.21 |
| 7%CNTs+6%<br>Ag NWs | 4.54               | 4.91  | 5.61  | 6.70  | 7.88  | 10.07 | 13.55 | 19.00 | 23.21 | 29.26 |
| 8%CNTs+2%<br>Ag NWs | 8.55               | 11.93 | 11.67 | 11.36 | 11.38 | 11.70 | 12.66 | 15.16 | 21.66 | 31.93 |
| 8%CNTs+4%<br>Ag NWs | 14.28              | 16.77 | 18.43 | 21.29 | 25.87 | 28.78 | 32.42 | 38.57 |       |       |
| 9%CNTs+2%<br>Ag NWs | 8.10               | 9.66  | 10.39 | 11.73 | 12.96 | 15.53 | 18.94 | 22.19 | 27.12 | 33.50 |

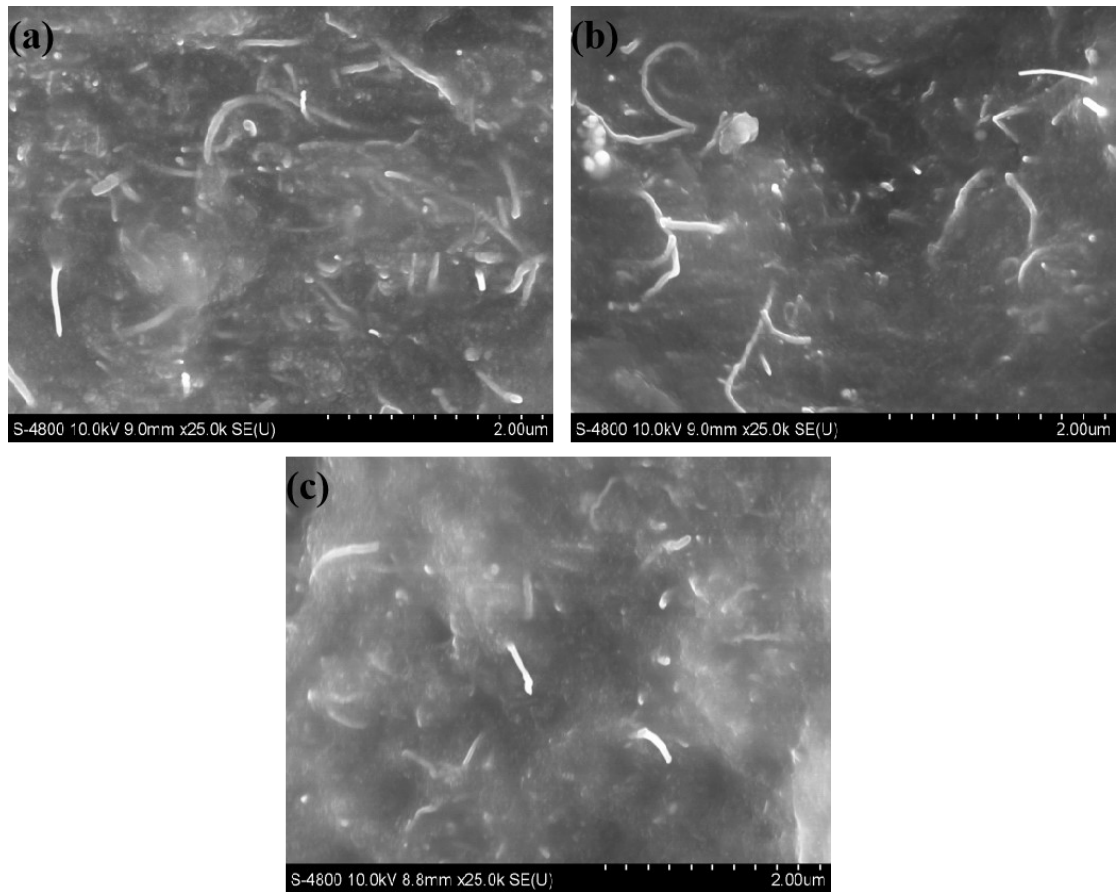

Fig.S1. Surface morphology of the conductive material under different tensile strains. (a)10%. (b) 30%. (c) 50%.

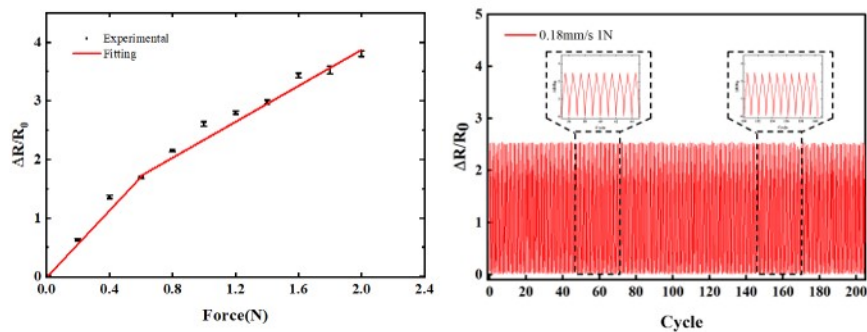

Fig.S2. Characterization results of the tactile sensor after being placed at room temperature for three months. (a) Force-sensing sensitivity characterization. (b) Cyclic loading and unloading tests.

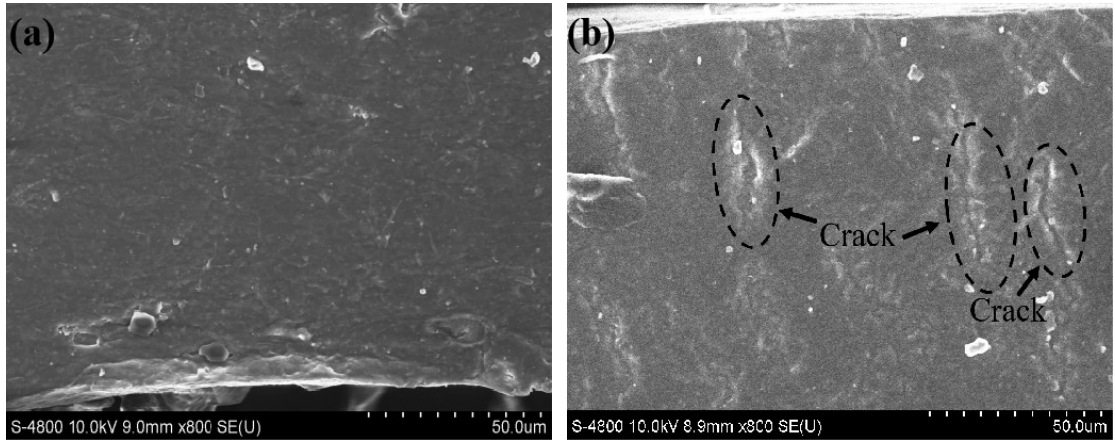

Fig.S3 Morphology of the crack on composite surface under different service environments: (a) the sensor was cycled continuously 200 times per day at its maximum compressive volume and repeated over 30 days, (b) continuous stretching the sensor at a tensile strain of 80% for 200 cycles.
